# Supplementary material for: Design of hydrogel–microgel composites with tailored small molecule release profiles
Source: Royal Society of Chemistry journal article supplement (doi:10.1039/d2tb00364c), 2022-01-01
Supplement: d2tb00364c1.pdf [file d2tb00364c1.pdf]

# Supporting Information

## Design of Hydrogel–Microgel Composites with Tailored Small Molecule Release Profiles

Siyuan Guo, Daniel Wong, Sifan Wang, Ravleen Gill, and Michael J. Serpe\*

Department of Chemistry, University of Alberta, Edmonton, Alberta, Canada T6G 2G2

\* [serpe@ualberta.ca](mailto:serpe@ualberta.ca)

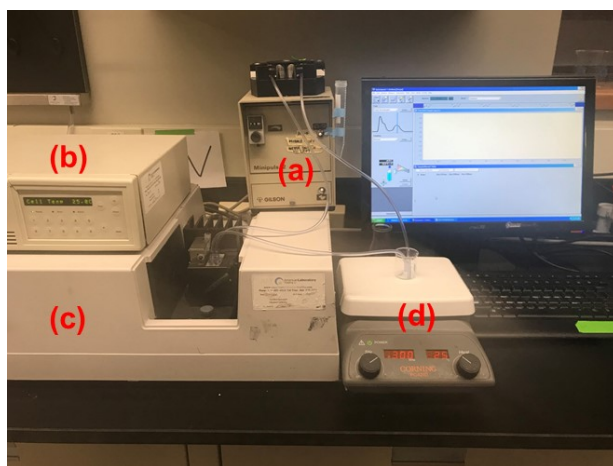

**Fig. S1.** Photograph of the instrumental setup used for the CV release experiments. (a) Peristaltic pump, (b) Temperature controller, (c) UV-Vis spectrometer, and (d) Heating/stirring plate.

**Table S1.** List of the Mole Ratios, Monomer Compositions, and Selected Solvents for Different HMC Materials

| HMC Samples             | NIPAm | BIS | BVB | AMPS | OMA | HEAm | Solvent                        | Microgels                       |
|-------------------------|-------|-----|-----|------|-----|------|--------------------------------|---------------------------------|
| HMC-5-BIS<br>(HMC (CV)) | 95%   | 5%  | -   | -    | -   | -    | DI water                       | CV-loaded                       |
| HMC-10-BIS              | 90%   | 10% | -   | -    | -   | -    | DI water                       | CV-loaded                       |
| HMC-15-BIS              | 85%   | 15% | -   | -    | -   | -    | DI water                       | CV-loaded                       |
| HMC-1-AMPS              | 94%   | 5%  | -   | 1%   | -   | -    | DI water                       | CV-loaded                       |
| HMC-2-AMPS              | 93%   | 5%  | -   | 2%   | -   | -    | DI water                       | CV-loaded                       |
| HMC-1-BVB               | 94%   | 5%  | 1%  | -    | -   | -    | DI water                       | CV-loaded                       |
| HMC-2-BVB               | 93%   | 5%  | 2%  | -    | -   | -    | DI water                       | CV-loaded                       |
| HMC-5-BISa              | 95%   | 5%  | -   | -    | -   | -    | Ethanol : Water<br>7:3 (v/v)   | Pure                            |
| HMC-5-OMA               | 90%   | 5%  | -   | -    | 5%  | -    | Ethanol : Water<br>= 7:3 (v/v) | Pure                            |
| HMC-10-OMA              | 85%   | 5%  | -   | -    | 10% | -    | Ethanol : Water<br>= 7:3 (v/v) | Pure                            |
| HMC-5-HEAm              | 90%   | 5%  | -   | -    | -   | 5%   | Ethanol : Water<br>= 7:3 (v/v) | Pure                            |
| HMC-10-<br>HEAm         | 85%   | 5%  | -   | -    | -   | 10%  | Ethanol : Water<br>= 7:3 (v/v) | Pure                            |
| HMC (AY)                | 95%   | 5%  | -   | -    | -   | -    | DI water                       | AY-loaded                       |
| HMC (RhB)               | 95%   | 5%  | -   | -    | -   | -    | DI water                       | RhB-<br>loaded                  |
| HMC (CV, AY)            | 95%   | 5%  | -   | -    | -   | -    | DI water                       | CV-loaded<br>and AY-<br>loaded  |
| HMC (CV,<br>RhB)        | 95%   | 5%  | -   | -    | -   | -    | DI water                       | CV-loaded<br>and RhB-<br>loaded |

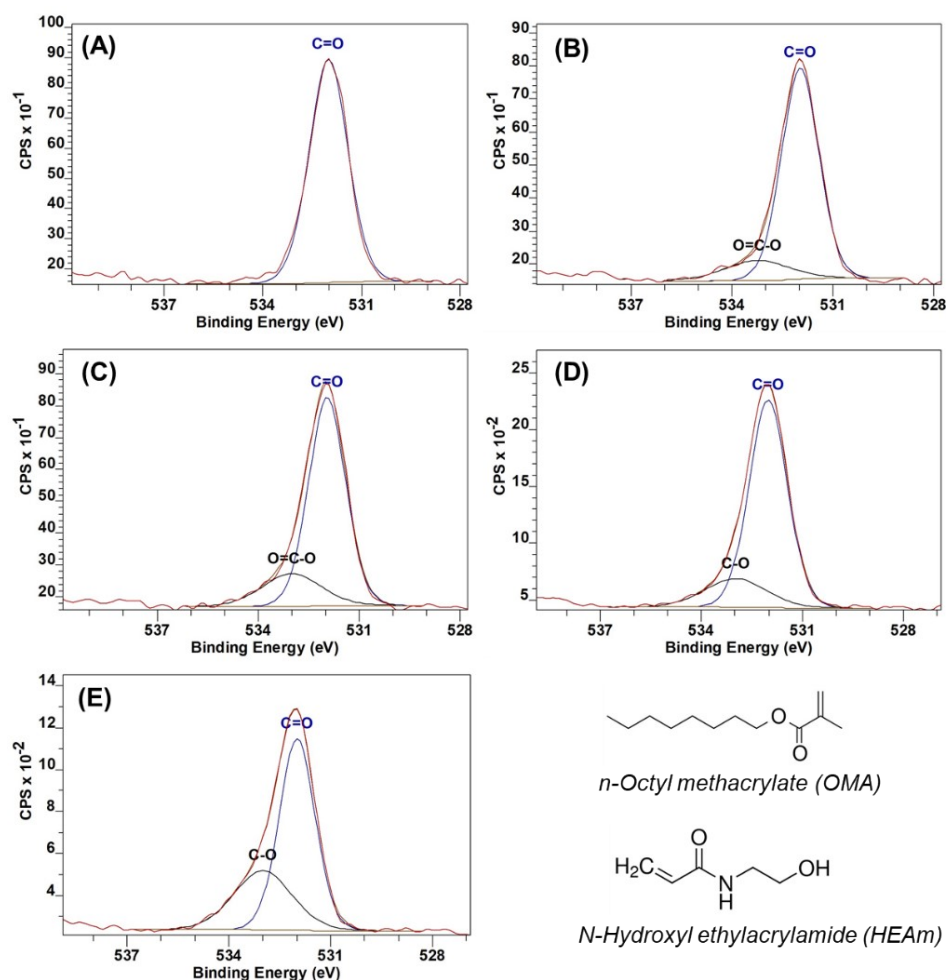

**Fig. S2.** O 1s high resolution XPS spectrum and fitting for (A) HMC-5-BISa, (B) HMC-5-OMA, (C) HMC-10-OMA, (D) HMC-5-HEAm, and (E) HMC-10-HEAm samples.

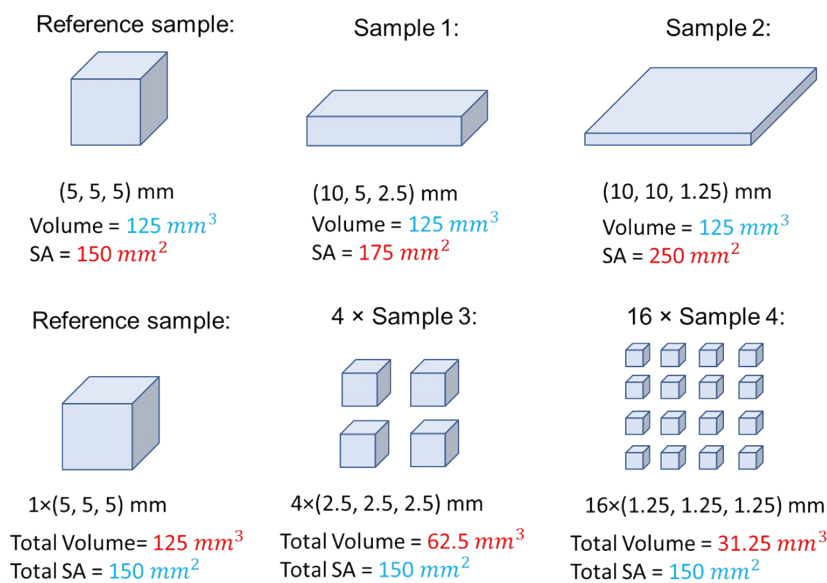

**Fig. S3.** Illustration showing the HMC-5-BIS samples with different dimensions

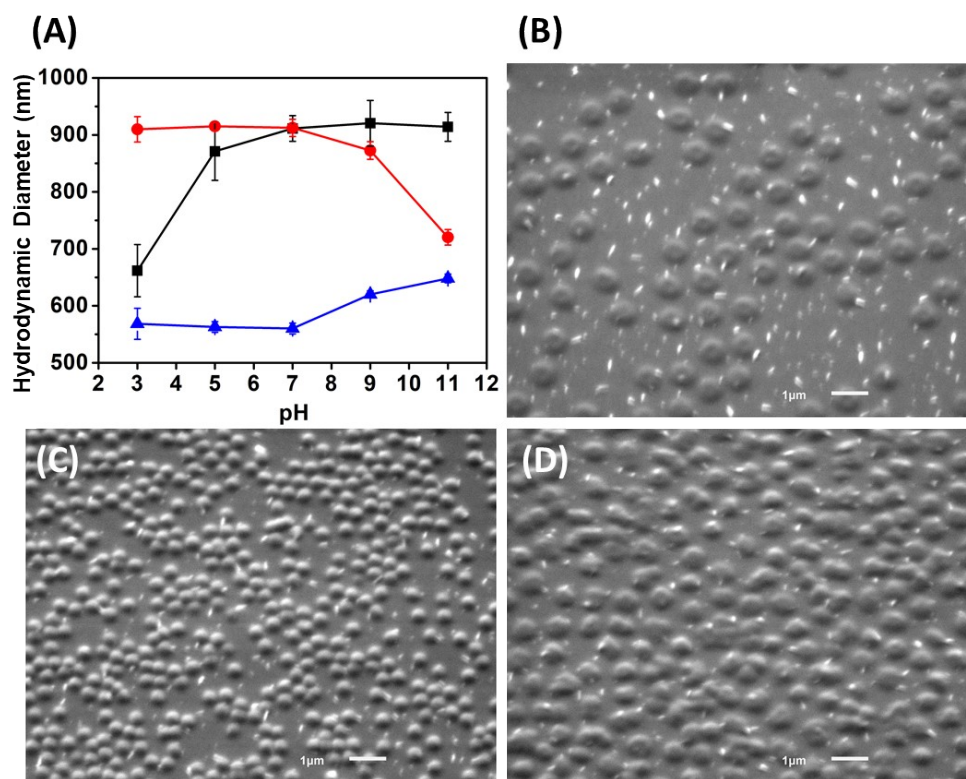

**Fig. S4.** (A) Hydrodynamic diameter of microgels at the different pH, (■) pNIPAm-*co*-AAc microgel, (●) pNIPAm-*co*-APMAH microgel, (▲) pNIPAm-*co*-APBA microgel. Error bars represent the standard deviations of three measurements. (B), (C) and (D) are the SEM images of pNIPAm-*co*-AAc, pNIPAm-*co*-APBA, and pNIPAm-*co*-APMAH microgels, respectively (scale bar = 1 μm).

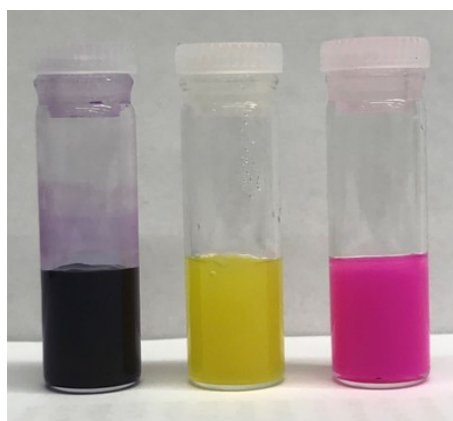

**Fig. S5.** Photographs of the three different model drug-loaded HMC materials. Left: HMC (CV), middle: HMC (AY), and right: HMC (RhB).
